# Supplementary material
Source: Springer Nature journal article supplement (https://www.springermedizin.de/resource/supplementary/12936_2013_3152_MOESM8_ESM.pdf/9546286)
Supplement: MOESM8 [file 9546286]

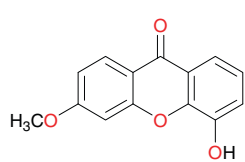

5-Hydroxy-3-methoxyxanthone (76)

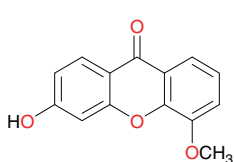

3-Hydroxy-5-methoxyxanthone (77)

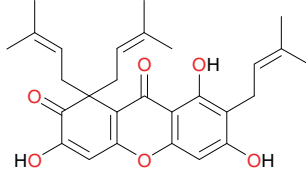

Allanxanthone C (78)

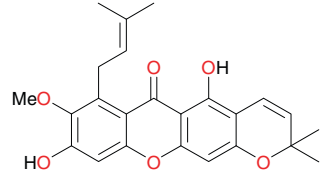

Garciniafuran (79)

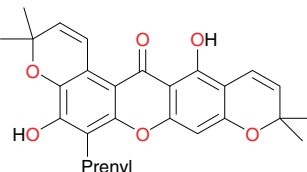

Tovophyllin A (80)

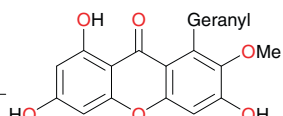

Rubraxanthone (81)

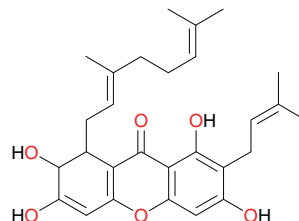

Norcowanin (82)

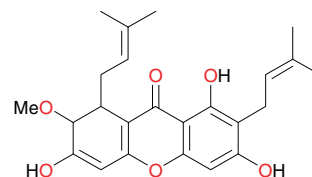

Mangostin (83)

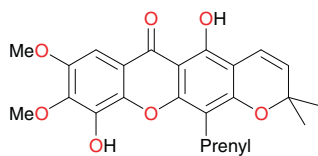

Gaboxanthone (84)

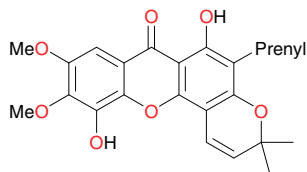

Symphonin (85)

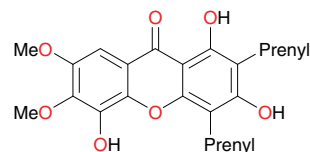

Globuliferin (86)

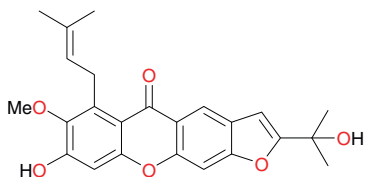

Pentadexanthone (87)

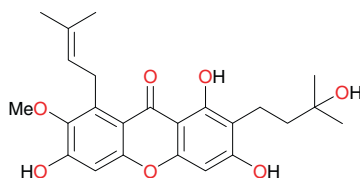

Cratoxylone (88)

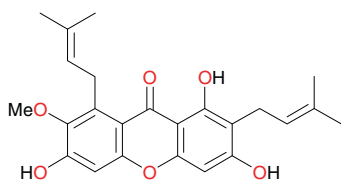

$\alpha$ -Mangostin (89)

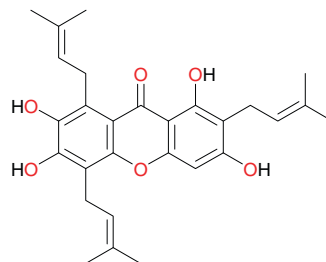

Garcinone E (90)
